# Supplementary material for: Magnitude and Determinants of Postnatal Mothers' Knowledge of Essential Newborn Care at Home in Rural Ethiopia
Source: Frontiers journal article supplement (doi:10.3389/fped.2022.860094), 2022-04-29
Supplement: Data_Sheet_1.PDF [file Data_Sheet_1.PDF]

## Questionnaire

### English Version Questionnaire

Questionnaire ID no. \_\_\_\_\_

#### General instructions

1. Choose one of the alternatives given for each question

2. If your answer is not found among the given alternative tell your answer to the interviewer

| S. No_                                      | Questions                                            | Response                                                                                                                                                  | Code | skip           |
|---------------------------------------------|------------------------------------------------------|-----------------------------------------------------------------------------------------------------------------------------------------------------------|------|----------------|
| <b>I. Socio-demographic characteristics</b> |                                                      |                                                                                                                                                           |      |                |
| 101                                         | The age of your infant?                              | _____                                                                                                                                                     |      | Next visit     |
| 102                                         | What is the sex of your baby?                        | 1. Male<br>2. Female                                                                                                                                      |      |                |
| 103                                         | How old are you?                                     | _____ years                                                                                                                                               |      |                |
| 104                                         | Can you read and write?                              | 1. Yes<br>2. No _____                                                                                                                                     |      | <del>106</del> |
| 105                                         | What is the highest level of education you attained? | 1. No formal education<br>2. Primary (1-8 <sup>th</sup> )<br>3. Secondary (9 <sup>th</sup> -12 <sup>th</sup> )<br>4. College and above                    |      |                |
| 106                                         | What is your current marital status?                 | 1. Single<br>2. Married _____<br>3. Divorce/ separated<br>4. Widowed<br>5. Other (specify) _____                                                          |      | <del>107</del> |
| 107                                         | What is educational status of your husband?          | 1. No formal education<br>2. Primary (1-8 <sup>th</sup> )<br>3. Secondary (9 <sup>th</sup> -12 <sup>th</sup> )<br>4. College and above                    |      |                |
| 108                                         | What is your religion?                               | 1. Orthodox<br>2. Muslim<br>3. Protestant<br>4. Others (specify) _____                                                                                    |      |                |
| 109                                         | What is your ethnic group?                           | 1. Oromo<br>2. Amhara<br>3. Tigre<br>4. Other (specify) _____                                                                                             |      |                |
| 110                                         | Your occupational status                             | 1. Governmental employee<br>2. Private employee<br>3. Housewife<br>4. Farmer<br>5. Daily laborer<br>6. Merchant<br>7. Student<br>8. Other (specify) _____ |      |                |

|                                                                   |                                                                      |                                                                                                                                                                                                         |  |       |
|-------------------------------------------------------------------|----------------------------------------------------------------------|---------------------------------------------------------------------------------------------------------------------------------------------------------------------------------------------------------|--|-------|
| 111                                                               | Your residence?                                                      | 1. Urban<br>2. Rural                                                                                                                                                                                    |  |       |
| <b>Part II: Obstetric and maternal health service information</b> |                                                                      |                                                                                                                                                                                                         |  |       |
| 201                                                               | How many times did you gave birth?                                   | _____                                                                                                                                                                                                   |  |       |
| 202                                                               | How many times you became pregnant (including abortion, stillbirth)? | _____                                                                                                                                                                                                   |  |       |
| 203                                                               | How many times do you experienced abortion?                          | _____                                                                                                                                                                                                   |  |       |
| 204                                                               | Did you attend ANC during your recent pregnancy?                     | 1. Yes<br>2. No _____                                                                                                                                                                                   |  | → 209 |
| 205                                                               | How many times have you attended ANC in your recent pregnancy?       | 1. One<br>2. Two<br>3. Three<br>4. Four and above                                                                                                                                                       |  |       |
| 206                                                               | Whom did you see during your recent ANC visit?                       | 1. Physician<br>2. Health officer<br>3. Midwife/nurse<br>4. HEWS<br>5. Other(specify)_____                                                                                                              |  |       |
| 207                                                               | Did you receive counseling during your recent ANC period?            | 1. Yes<br>2. No _____                                                                                                                                                                                   |  | →209  |
| 208                                                               | About what did you counseled? (Multiple answer is possible)          | 1. Breast feeding<br>2. Maternal nutrition<br>3. Family planning<br>4. Hygiene<br>5. HIV awareness<br>6. Essential newborn care<br>7. Newborn danger signs<br>8. Immunization<br>9. Other(specify)_____ |  |       |
| 209                                                               | Where did you deliver your recent baby?                              | 1. Hospital<br>2. Health center<br>3. Health post<br>4. Private health institution<br>5. Home<br>6. Other(specify)_____                                                                                 |  |       |
| 210                                                               | Who assisted you during your recent delivery?                        | 1. Health professional<br>2. HEWs<br>3. TBA<br>4. TTBA<br>5. Relative(friend)<br>6. No one                                                                                                              |  |       |
| 211                                                               | What was your mode of delivery?                                      | 1.Spontaneous vaginal delivery<br>2.Instrumental assisted delivery<br>3.Caesarean section                                                                                                               |  |       |
| 212                                                               | Were you seen by health workers immediately after delivery?          | 1. Yes<br>2. No _____                                                                                                                                                                                   |  | → 301 |
| 213                                                               | By whom did you seen?                                                | 1. Physician<br>2. Health officer                                                                                                                                                                       |  |       |

|     |                                                                              |                                                                                                                                                                                                                   |  |  |
|-----|------------------------------------------------------------------------------|-------------------------------------------------------------------------------------------------------------------------------------------------------------------------------------------------------------------|--|--|
|     |                                                                              | 3. Midwife/nurse<br>4. HEWs<br>5. Other(specify)_____                                                                                                                                                             |  |  |
| 214 | Did you receive counselling about neonatal danger signs during PNC?          | 1. Yes<br>2. No                                                                                                                                                                                                   |  |  |
| 215 | If yes to q-214, About what did you counseled? (Multiple answer is possible) | 1.Breast feeding<br>2.Maternal nutrition<br>3.Family planning<br>4.Childbirth complications<br>5.Postnatal care<br>6.Essential newborn care<br>7.Newborn danger signs<br>8.Immunizations<br>8.Other(specify)_____ |  |  |

### Part III Maternal knowledge of Essential New born Care

#### 3.1 Breast Feeding

|                          |                                                                                                            |                                                                                                     |     |
|--------------------------|------------------------------------------------------------------------------------------------------------|-----------------------------------------------------------------------------------------------------|-----|
| 301                      | When is the appropriate time for initiation of Breastfeeding?                                              | 1. Within one hour<br>2. After one hour<br>3. don't know                                            |     |
|                          | Did you know that colostrum feeding is important for the new born?                                         | 1.Yes<br>2.No                                                                                       |     |
| 302                      | Have you squeezed out/removed the colostrum before you start breastfeeding?                                | 1.Yes<br>2.No                                                                                       |     |
| 303                      | Did you feed your newborn the first milk (colostrum) that came out from your breasts?                      | 1.Yes<br>2. No                                                                                      |     |
| 304                      | Have you provided anything other than breast milk for the new born?                                        | 1. Yes<br>2.No  | 307 |
| 305                      | If yes for the above question, when did you give it for the first time?                                    | _____                                                                                               |     |
| 306                      | What did you gave to the new born immediately after delivery? (Multiple answer is possible)                | 1.Nothing<br>2.Cow's milk<br>3.Plain water<br>4.Formula feed<br>5.Sugar water<br>8.Other (specify)  |     |
| 307                      | Did you know that breast should be given on demand for the new born?                                       | 1.Yes<br>2.No                                                                                       |     |
| 308                      | Do you think that the newborn baby should be nursed in a room separated from his/her mother after delivery | 1. Yes<br>2. No                                                                                     |     |
| 309                      | Did you now exclusive breast feeding is recommended for 6 months?                                          | 1.Yes<br>2.No                                                                                       |     |
| <b>3.2. Immunization</b> |                                                                                                            |                                                                                                     |     |
| 310                      | Was your baby immunized at birth?                                                                          | Yes<br>No                                                                                           |     |
| 311                      | Did you know that the new born need to be vaccinated at birth                                              | Yes<br>No                                                                                           |     |

|                         |                                                                                   |                                                                                                                            |  |
|-------------------------|-----------------------------------------------------------------------------------|----------------------------------------------------------------------------------------------------------------------------|--|
| 312                     | What is the importance of vaccination?                                            | 1.To prevent disease<br>2.I don't know<br>3.Other (specify)                                                                |  |
| <b>3.3 Thermal care</b> |                                                                                   |                                                                                                                            |  |
| 313                     | Did you know about thermal care?                                                  | Yes<br>No                                                                                                                  |  |
| 314                     | What did you do to keep your baby warm?<br>(Multiple answer is possible)          | 1.Skin to skin contact<br>2. Immediately wrapped the baby cloth<br>3.Cover head with a cape                                |  |
| 315                     | Which types of cloth you used to wrap the baby after bath?                        | 1. New cloth<br>2. Clean and dry old cloth<br>3. Soiled and old cloth<br>8. Other, Specify_____                            |  |
| 316                     | What is the correct time to bath your baby after delivery?                        | 1.Within 24 hours<br>2.After 24 hours<br>8.Other(specify)                                                                  |  |
| 317                     | Temperature of the water is?                                                      | 1. Warm<br>2. Cold                                                                                                         |  |
| <b>3.4 Cord care</b>    |                                                                                   |                                                                                                                            |  |
| 318                     | Do you know about cord care?                                                      | 1. Yes<br>2.No                                                                                                             |  |
| 319                     | What did you use to tie a cord?                                                   | 1. Sterile cord tie<br>2.Unsterile material<br>3. I don't know<br>8. other (specify)_____                                  |  |
| 320                     | Which instrument is used to cut the cord?                                         | 1. New blade<br>2. Used blade<br>3. Knife<br>4. Scissor<br>5. Other (specify)____<br>8. Do not know                        |  |
| 321                     | What did you do to the umbilical stump after the cord is cut?                     | 1.Cover with cloth<br>2.Uncover, keep dry and clean<br>8.I do not know                                                     |  |
| 322                     | Did you apply anything on the stump after the baby's cord was cut?                | 1.Yes<br>2.No                                                                                                              |  |
| 323                     | If yes, what was applied? (Multiple answer is possible)                           | 1.Butter<br>2.Vaseline/oil<br>3. Antiseptics<br>4.Cow dung<br>5. Ash/soil<br>8.Other (specify)_____                        |  |
| 324                     | What do you do if you see a sign of cord infection? (Multiple answer is possible) | 1. Give home remedies<br>2. Delay until it heals by itself<br>3. Seek care from health facility<br>4. Other (specify)_____ |  |

**Thank you for your cooperation!!**
